# Supplementary material for: Frustrated amino functional group coupling with electric field makes CO2activation easier
Source: Royal Society of Chemistry journal article supplement (doi:10.1039/d3cp01344h), 2023-01-01
Supplement: d3cp01344h1.pdf [file d3cp01344h1.pdf]

## SUPPLEMENTARY INFORMATION

FOR

### Frustrated amino functional group coupling with electric field makes CO<sub>2</sub> activation easier

Nian Wu\*

Department of Chemistry, Hubei Key Laboratory of Electrochemical Power Sources,  
Wuhan University, Wuhan 430072, China

E-mail: wunianwhu@gmail.com

#### Computational method

All calculations were performed using the Vienna ab initio simulation package (VASP) with the projector augmented wave formalism.[1] The electron-ion interactions were described by projected augmented wave (PAW) method with a kinetic energy cutoff of 420 eV. To correctly depict interaction caused by polarization and dispersion, van der Waals interactions was included in the D2 method of Grimme.

During the geometry optimization, the bottom two atomic layers was fixed and the remaining atoms were relaxed using a conjugate gradient method until the Hellmann-Feynman force on every atom could be smaller than 0.02 eV/Å. And the total energy converged to 1e-5 eV and the Brillouin zone was sampled with a 3×3×1 Monkhorst-Pack k point grid. The smearing method of second Methfessel-Paxton (MP) was applied with sigma parameter of 0.1 eV to determine how the partial occupancies.

The external electric field is actualized by adding an artificial dipole sheet defined by Neugebauer and Scheffler, which allows us to specify the direction and intensity of an electric field ranging from -0.6 V/Å to 0.6 V/Å perpendicular to the slab, i.e., along z axis. The direction of applied electric field was perpendicular to the Cu(111), and the upward (downward) direction was defined as a positive (negative) one. Dipole corrections was turned on to avoid interactions between the periodically repeated images.

The adsorption energy of a molecular CO<sub>2</sub> interaction with Cu(111) and CH<sub>3</sub>NH<sub>2</sub> is defined as follows:

$$E_b = E_{\text{(Cu+CO}_2\text{+CH}_3\text{NH}_2\text{)}} - E_{\text{(Cu+CH}_3\text{NH}_2\text{)}} - E_{\text{CO}_2}$$

where  $E_{\text{(Cu+CO}_2\text{+CH}_3\text{NH}_2\text{)}}$  denote the energy of the optimized configurations of CO<sub>2</sub> in Cu(111) with CH<sub>3</sub>NH<sub>2</sub> under electric field,  $E_{\text{(Cu+CH}_3\text{NH}_2\text{)}}$  indicates the energy of the stable energy of Cu(111) with CH<sub>3</sub>NH<sub>2</sub> under corresponding electric field,  $E_{\text{CO}_2}$  represents the energy of the stable energy of CO<sub>2</sub> in the gas phase.

The charge density difference ( $\nabla\rho$ ), was obtained by subtracting electron density of CO<sub>2</sub> and Cu-CH<sub>3</sub>NH<sub>2</sub> in standalone state from the whole system:

$$\nabla\rho = \rho(\text{Cu-CH}_3\text{NH}_2\text{-CO}_2) - \rho(\text{Cu-CH}_3\text{NH}_2) - \rho(\text{CO}_2)$$

Bader program[2] and PSI4 software [3] were used to analyze charge transfer and decompose energy contributions.

## Stable structures under $\text{CH}_3\text{NH}_2$ at flexible altitude and electric field

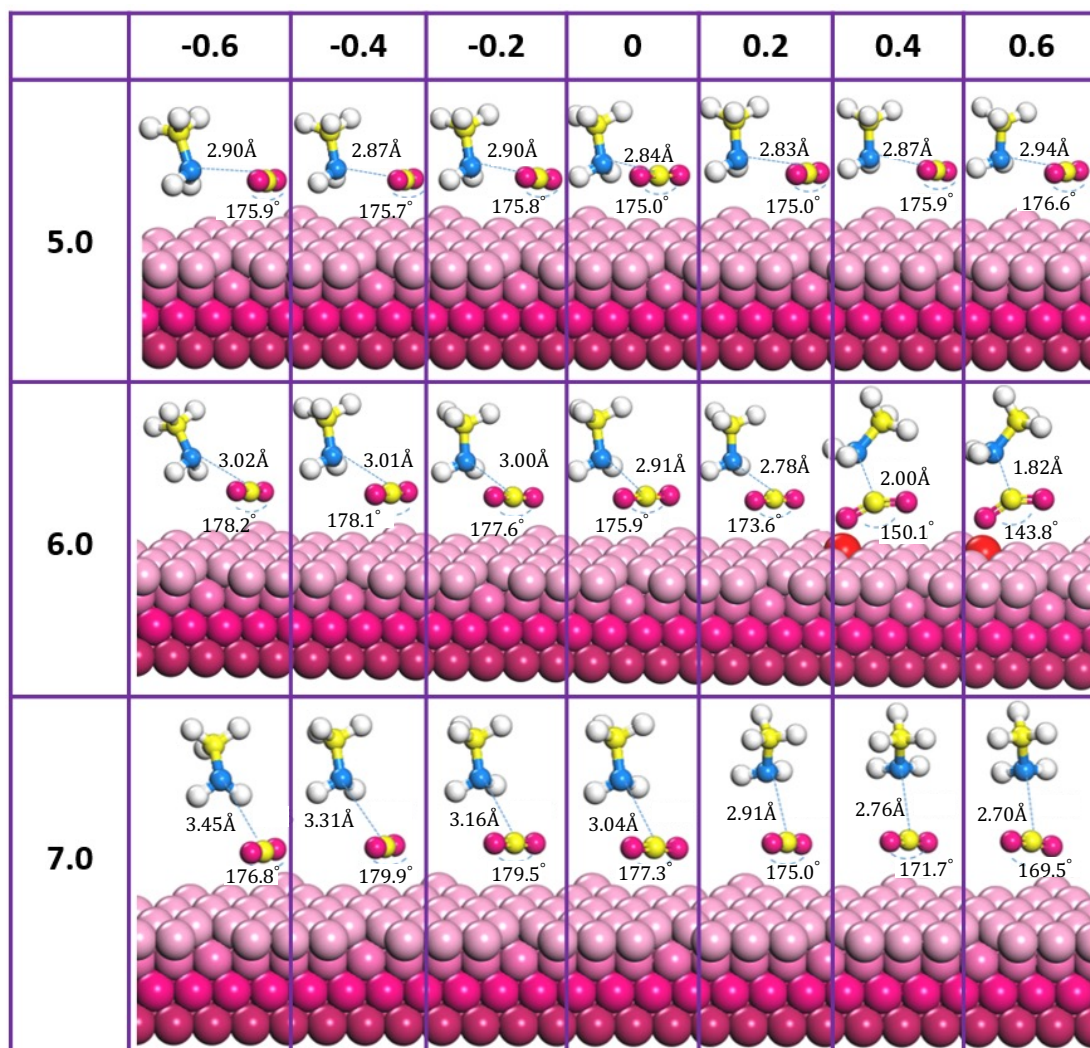

Figure SI-A. Optimized configurations of  $\text{CO}_2$  adsorbed on microenvironments of  $\text{CH}_3\text{NH}_2$  hanging at three heights 5.0 Å, 6.0 Å, 7.0 Å above  $\text{Cu}(\text{II})$  with flexible electric field ranging from  $-0.6\text{V}/\text{Å}$  to  $0.6\text{V}/\text{Å}$ . unit is angstrom for distance and degree for angle.

## PSI energy decomposition analysis

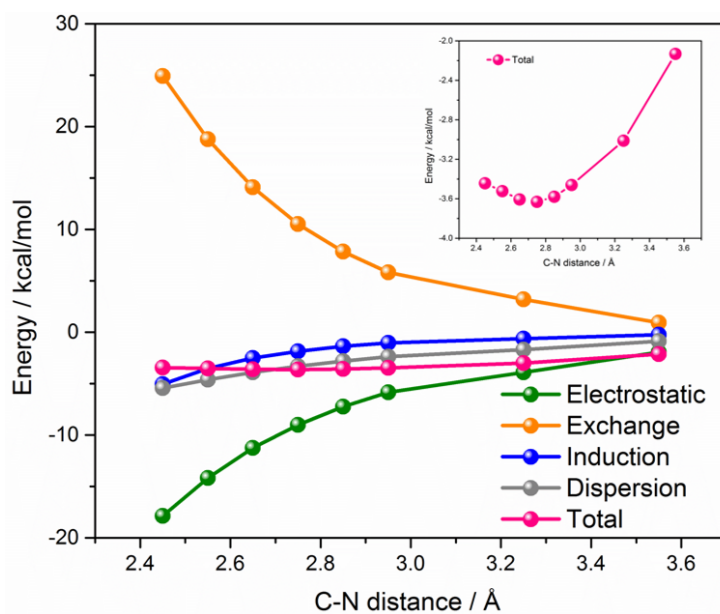

Figure SI-B. Energy decomposition analysis as C-N distance changes.

## Density of state

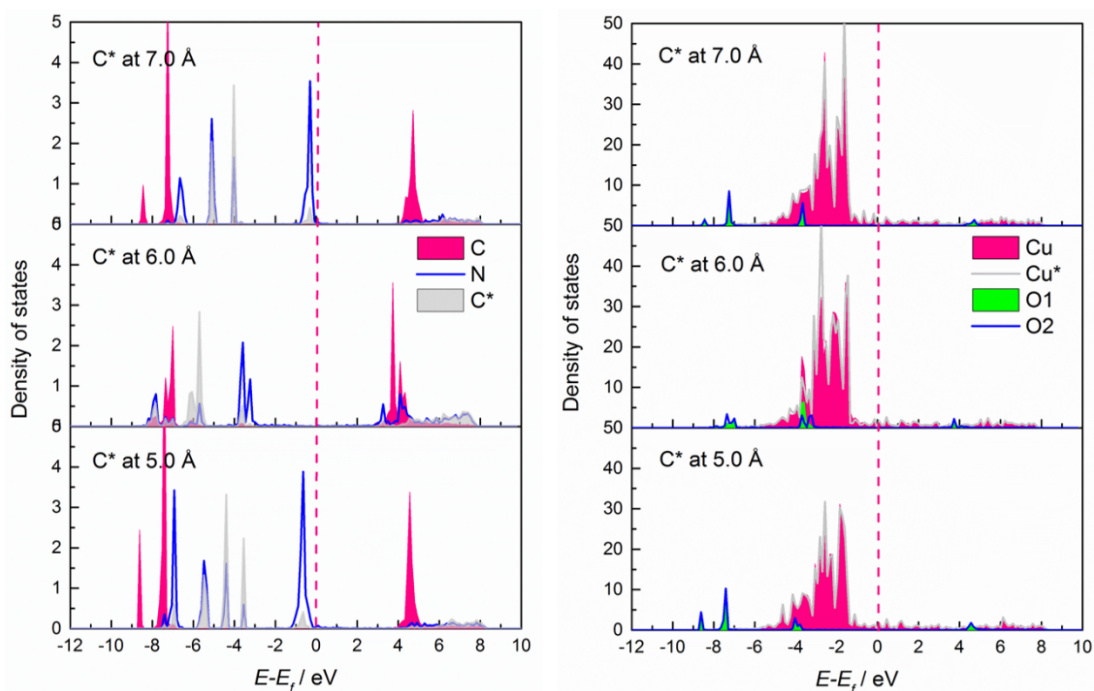

Figure SI-C. left: Projected density of states of C in CO<sub>2</sub>, C and N in CH<sub>3</sub>NH<sub>2</sub> of optimized configurations of three attitudes CH<sub>3</sub>NH<sub>2</sub> above Cu(111) under 0.6 V/Å. right: Projected density of states of Cu and O at the same condition as figure a, where O1 is the close oxygen atoms in CO<sub>2</sub> to Cu(111), O2 is another oxygen atom in CO<sub>2</sub>. Cu is the closest copper atom to O1, Cu\* is a reference copper on the surface without direct interaction with CO<sub>2</sub>.

## PH<sub>2</sub> series of functional groups

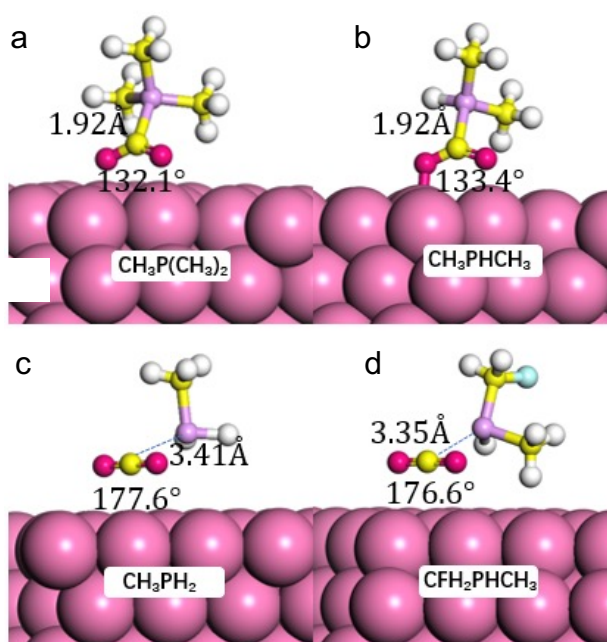

Figure SI-D. Optimized configurations of CO<sub>2</sub> under CH<sub>3</sub>PH<sub>2</sub> series chemical groups including electron-donor groups CH<sub>3</sub>P(CH<sub>3</sub>)<sub>2</sub>(a), CH<sub>3</sub>PHCH<sub>3</sub>(b) and electron-acceptor groups where H in CH<sub>3</sub> was replaced by F(d), hanging 6.0 Å above Cu(111) surface under electric field strength 0.6 V/Å.

## OH functional group

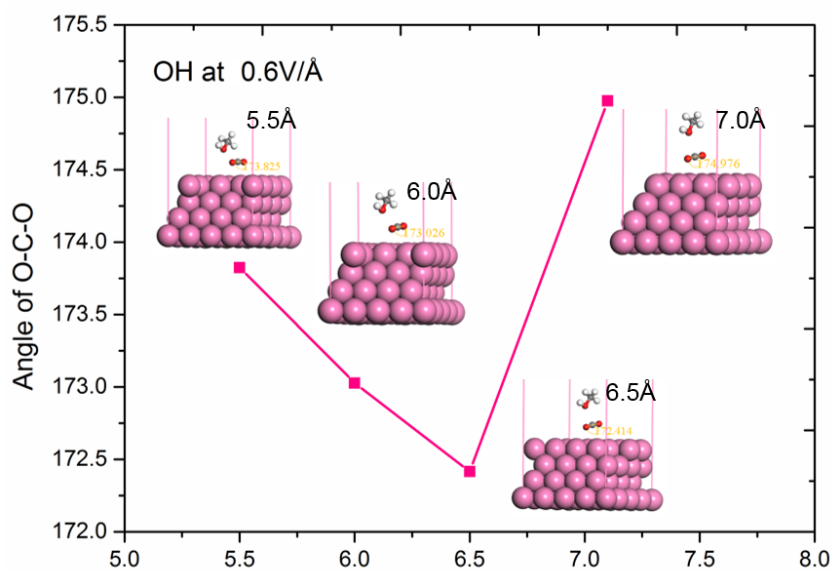

Figure SI-E. Optimized configurations of CO<sub>2</sub> adsorbed on microenvironments of CH<sub>3</sub>OH hanging at different height above Cu(111) with 0.6 V/Å electric field.

---

## References

- (1) Kresse, G.; Joubert, D. From ultrasoft pseudopotentials to the projector augmented-wave method. *Physical review b* **1999**, *59*, 1758.
- (2) Yu, M.; Trinkle, D. R. Accurate and efficient algorithm for Bader charge integration. *The Journal of chemical physics* **2011**, *134*, 064111
- (3) Parrish, R. M.; Burns, L. A.; Smith, D. G.; Simmonett, A. C.; DePrince III, A. E.; Hohenstein, E. G.; Bozkaya, U.; Sokolov, A. Y.; Di Remigio, R.; Richard, R. M., et al. Psi4 1.1: An open-source electronic structure program emphasizing automation, advanced libraries, and interoperability. *Journal of chemical theory and computation* **2017**, *13*, 3185–3197.
